# Supplementary material
Source: HighWire-hosted journal article supplement (https://www.cmajopen.ca/highwire/filestream/81341/field_highwire_adjunct_files/1/2020-0010-2-at.pdf)
Supplement: 2020-0010-2-at.pdf [file 2020-0010-2-at.pdf]

## Appendix 2 (as supplied by author)

**Table 1. Pediatric relevancy of oncology drugs with adult indications only in Health Canada monographs**

| Active ingredient(s)       | Brand name | Year of approval | Biologic | Adult indication(s)                                                                                                                                                                                                                                                                                                                                                                                                                                      | Oncology molecular target                            |
|----------------------------|------------|------------------|----------|----------------------------------------------------------------------------------------------------------------------------------------------------------------------------------------------------------------------------------------------------------------------------------------------------------------------------------------------------------------------------------------------------------------------------------------------------------|------------------------------------------------------|
| Afatinib Dimaleate         | GIOTRIF    | 2013             | No       | Epidermal Growth Factor Receptor tyrosine kinase inhibitor native patients with metastatic adenocarcinoma of the lung with activating EGFR mutations; Locally advanced or metastatic non-small cell lung cancer of squamous histology progressing after platinum-based chemotherapy                                                                                                                                                                      | CTLA-4                                               |
| Aflibercept                | ZALTRAP    | 2014             | Yes      | Combination therapy for metastatic colorectal cancer                                                                                                                                                                                                                                                                                                                                                                                                     | Vascular Endothelial Growth Factor                   |
| ALECTINIB HYDROCHLORIDE    | ALECENSARO | 2016             | No       | For the first-line treatment of patients with anaplastic lymphoma kinase (ALK)-positive, locally advanced (not amenable to curative therapy) or metastatic non-small cell lung cancer (NSCLC); As monotherapy for the treatment of patients with anaplastic lymphoma kinase (ALK)-positive, locally advanced (not amenable to curative therapy) or metastatic non-small cell lung cancer (NSCLC) who have progressed on or are intolerant to crizotinib. | Targeted alpha-particle therapy (TAT)                |
| AXITINIB                   | INLYTA     | 2012             | No       | Metastatic renal cell carcinoma of clear cell histology after failure of prior systematic therapy with either a cytokine or the VEGFR-TKI, sunitinib                                                                                                                                                                                                                                                                                                     | cyclic dependent kinases 4 and 6 (CDK 4/6) inhibitor |
| AZACITIDINE                | VIDAZA     | 2009             | No       | Treatment for those who are not eligible for hematopoietic stem cell transplantation with Myelodysplastic Syndrome or Acute Myeloid Leukemia                                                                                                                                                                                                                                                                                                             | CD38 inhibitor                                       |
| BENDAMUSTINE HYDROCHLORIDE | TREANDA    | 2012             | No       | Relapsed indolent B-cell non-Hodgkin lymphoma (NHL) who did not respond to or progressed during or shortly following treatment with a rituximab regimen; Symptomatic chronic lymphocytic leukemia (CLL) who have received no prior treatment.                                                                                                                                                                                                            | TP53 (tumor protein) dependant activation            |
| BOSUTINIB                  | BOSULIF    | 2014             | No       | Newly-diagnosed chronic phase (CP) Philadelphia chromosome positive chronic myelogenous leukemia; Chronic, accelerated, or blast phase Philadelphia chromosome-positive (Ph+) chronic myelogenous leukemia (CML)                                                                                                                                                                                                                                         | mTOR inhibitor                                       |
| BRENTUXIMAB VEDOTIN        | ADCETRIS   | 2013             | Yes      | Hodgkin Lymphoma; Systemic Anaplastic Large Cell Lymphoma (sALCL), CD30-Expressing Peripheral T-cell lymphoma-Not Otherwise Specified (PTCL-NOS) or CD30-Expressing Angioimmunoblastic T-cell lymphoma (AITL); Systemic Anaplastic Large Cell Lymphoma; Primary Cutaneous Anaplastic Large Cell Lymphoma (pcALCL) or CD30-Expressing Mycosis Fungoides (MF)                                                                                              | anti-CD30 monoclonal antibody                        |
| CABAZITAXEL                | JEVTANA    | 2011             | No       | Treatment of patients with castration resistant metastatic prostate cancer previously treated with a docetaxel containing regimen                                                                                                                                                                                                                                                                                                                        | PD-1/PD-L1 blocking                                  |

|                                   |           |      |     |                                                                                                                                                                                                                                                                                                                                                                                                                                                                                         |                                                 |
|-----------------------------------|-----------|------|-----|-----------------------------------------------------------------------------------------------------------------------------------------------------------------------------------------------------------------------------------------------------------------------------------------------------------------------------------------------------------------------------------------------------------------------------------------------------------------------------------------|-------------------------------------------------|
| CARFILZOMIB                       | KYPROLIS  | 2016 | No  | Relapsed multiple myeloma for those who have received 1 to 3 prior lines of therapy                                                                                                                                                                                                                                                                                                                                                                                                     | 20S and 26S Proteasome inhibitor                |
| CELGENE INC                       | POMALYST  | 2014 | No  | In combination with dexamethasone (dex) and bortezomib is indicated in the treatment of adult patients with multiple myeloma (MM) who have received at least one prior treatment regimen that included lenalidomide; In combination with dexamethasone is indicated for patients with multiple myeloma for whom both bortezomib and lenalidomide have failed and who have received at least two prior treatment regimens and have demonstrated disease progression on the last regimen. | BCR-ABL kinase inhibitor                        |
| CERITINIB                         | ZYKADIA   | 2015 | Yes | Treatment of adult patients with anaplastic lymphoma kinase (ALK)-positive locally advanced (not amenable to curative therapy) or metastatic nonsmall cell lung cancer (NSCLC) who have progressed on or who were intolerant to crizotinib, with conditions, pending the results of studies to verify its clinical benefit; first line therapy for patients with ALK-positive locally advanced or metastatic NSCLC without conditions                                                   | ALK inhibitor                                   |
| COBIMETINIB FUMARATE              | COTELLIC  | 2016 | No  | For treatment of patients with unresectable or metastatic melanoma with a BRAF V600 mutation                                                                                                                                                                                                                                                                                                                                                                                            | microtubule-targeting agent                     |
| CRIZOTINIB                        | XALKORI   | 2012 | No  | Anaplastic lymphoma kinase-positive locally advanced or metastatic non-small cell lung cancer; Monotherapy for use in patients with ROS1-positive locally advanced or metastatic NSCLC                                                                                                                                                                                                                                                                                                  | ALK phosphorylation and ALK-mediated activation |
| Dabrafenib mesylate               | TAFINLAR  | 2013 | No  | Unresectable or metastatic melanoma; Adjuvant treatment of melanoma; Metastatic Non-Small Cell Lung Cancer                                                                                                                                                                                                                                                                                                                                                                              | Bcr-Abl kinase inhibitor                        |
| DARATUMUMAB                       | DARZALEX  | 2016 | Yes | Newly diagnosed multiple myeloma when ineligible for autologous stem cell transplant; Multiple myeloma in those who received at least one prior therapy; Multiple myeloma in those who received at least three prior lines of therapy including a proteasome inhibitor and an immunomodulatory agent, or who are refractory to both a PI and an IMiD                                                                                                                                    | Epidermal Growth Factor Receptor                |
| DASATINIB (DASATINIB MONOHYDRATE) | SPRYCEL   | 2007 | No  | Newly diagnosed Philadelphia chromosome chronic myeloid leukemia in chronic phase; Ph+ chronic, accelerated, or blast phase chronic myeloid leukemia with resistance or intolerance to prior therapy including imatinib; Ph+ chronic, accelerated, or blast phase chronic myeloid leukemia with resistance or intolerance to prior therapy including imatinib                                                                                                                           | BCL-2 inhibitor                                 |
| ELOTUZUMAB                        | EMPLICITI | 2016 | Yes | Treatment of patients with multiple myeloma who have received one to three prior therapies                                                                                                                                                                                                                                                                                                                                                                                              | Vascular Endothelial Growth Factor              |
| ERIBULIN MESYLATE                 | HALAVEN   | 2011 | No  | Metastatic breast cancer who have previously used at least two chemotherapeutic regimens for the treatment of metastatic disease; For treatment of unresectable advanced or metastatic liposarcoma subtype of soft tissue sarcoma                                                                                                                                                                                                                                                       | phosphoinositide 3-kinase inhibitor             |

|                                              |           |      |     |                                                                                                                                                                                                                                                                                                                                                                                                                                                                                                                                                                                                                                                                                                                                                                                                                                                                                |                                          |
|----------------------------------------------|-----------|------|-----|--------------------------------------------------------------------------------------------------------------------------------------------------------------------------------------------------------------------------------------------------------------------------------------------------------------------------------------------------------------------------------------------------------------------------------------------------------------------------------------------------------------------------------------------------------------------------------------------------------------------------------------------------------------------------------------------------------------------------------------------------------------------------------------------------------------------------------------------------------------------------------|------------------------------------------|
| Ibrutinib                                    | IMBRUVICA | 2014 | No  | Patients with previously untreated active chronic lymphocytic leukemia, including those with 17p deletion; In combination with ozenituzamab for the treatment of patients with previously untreated active CLL, including those with 17p deletion; For those with CLL who have received at least one prior therapy, including those with 17p deletion; In combination with bendamustine and rituximab for those with CLL who have received at least one prior therapy; Patients with relapsed or refractory mantle cell lymphoma; Patients with marginal zone lymphoma who require systemic therapy and have received at least one prior anti-CD20-based therapy; Treatment of patients with Waldenstrom's macroglobulinemia; In combination with rituximab for treatment of patients with WM; Patients with steroid dependent or refractory chronic graft versus host disease | BRAF and CRAF kinases inhibitor          |
| IDELALISIB                                   | ZYDELIG   | 2015 | No  | Chronic lymphocytic leukemia; Follicular lymphoma                                                                                                                                                                                                                                                                                                                                                                                                                                                                                                                                                                                                                                                                                                                                                                                                                              | RAS/MEK/ERK inhibitor                    |
| Ipilimumab                                   | YERVOY    | 2012 | Yes | Unresectable or metastatic melanoma; Metastatic renal cell carcinoma                                                                                                                                                                                                                                                                                                                                                                                                                                                                                                                                                                                                                                                                                                                                                                                                           | targeting CTLA-4                         |
| IXAZOMIB CITRATE                             | NINLARO   | 2016 | No  | Treatment of multiple myeloma in those who have received at least one prior treatment                                                                                                                                                                                                                                                                                                                                                                                                                                                                                                                                                                                                                                                                                                                                                                                          | targets DNA synthesis                    |
| LAPATINIB (LAPATINIB DITOSYLATE MONOHYDRATE) | TYKERB    | 2009 | No  | In combination with capecitabine for the treatment of patients with metastatic breast cancer whose tumours overexpress ErbB2; In combination with letrozole for the treatment of post-menopausal patients with hormone receptor positive metastatic breast cancer, whose tumours overexpress the ErbB2 receptor, and who are suitable for endocrine therapy.                                                                                                                                                                                                                                                                                                                                                                                                                                                                                                                   | EGFR inhibitor                           |
| LENALIDOMIDE                                 | REVLIMID  | 2008 | No  | To treat transfusion-dependant anemia due to low- or intermediate-1 risk myelodysplastic syndromes associated with a deletion 5q cytogenetic abnormality with or without additional cytogenetic abnormalities; multiple myeloma in those who are not eligible for stem cell transplant                                                                                                                                                                                                                                                                                                                                                                                                                                                                                                                                                                                         | Akt core signalling pathway              |
| LENVATINIB MESYLATE                          | LENVIMA   | 2015 | No  | Treatment of patients with locally recurrent or metastatic, progressive, radioactive; In combination with everolimus for the treatment of patients with advanced renal cell carcinoma (RCC) following one prior vascular endothelial growth factor (VEGF)-targeted therapy; iodine-refractory differentiated thyroid cancer (DTC); For the first-line treatment of adult patients with unresectable hepatocellular carcinoma (HCC). Efficacy and safety data for Child-Pugh Class B and Class C are not available; In combination with pembrolizumab, for the treatment of adult patients with advanced endometrial carcinoma that is not microsatellite instability high (MSI-H) or mismatch repair deficient (dMMR), who have disease progression following prior platinum-based systemic therapy, and are not candidates for curative surgery or radiation.                 | DNA                                      |
| NELARABINE                                   | ATRIANCE  | 2007 | No  | T-cell acute lymphoblastic leukemia and T-cell lymphoblastic lymphoma                                                                                                                                                                                                                                                                                                                                                                                                                                                                                                                                                                                                                                                                                                                                                                                                          | Bruton's tyrosine kinase (Btk) inhibitor |

|                                                          |          |      |     |                                                                                                                                                                                                                                                                                                                                                                                                                                                                                    |                                           |
|----------------------------------------------------------|----------|------|-----|------------------------------------------------------------------------------------------------------------------------------------------------------------------------------------------------------------------------------------------------------------------------------------------------------------------------------------------------------------------------------------------------------------------------------------------------------------------------------------|-------------------------------------------|
| NILOTINIB<br>(NILOTINIB<br>HYDROCHLORIDE<br>MONOHYDRATE) | TASIGNA  | 2008 | No  | Treatment of adult patients with newly diagnosed Philadelphia chromosome positive; Treatment of chronic phase (CP) and accelerated phase (AP) Philadelphia chromosome positive chronic myeloid leukemia (Ph+CML) in adult patients resistant to or intolerant of at least one prior therapy including imatinib. chronic myeloid leukemia (Ph+ CML) in chronic phase (CP).                                                                                                          | proteasome inhibitor                      |
| NIVOLUMAB                                                | OPDIVO   | 2015 | Yes | Unresectable or metastatic melanoma; Adjuvant treatment of melanoma; Metastatic Non-Small Cell Lung Cancer; Metastatic Renal Cell Carcinoma; Squamous Cell Carcinoma of the Head and Neck; Classical Hodgkin Lymphoma; Hepatocellular carcinoma                                                                                                                                                                                                                                    | TP53 (tumor protein) dependant activation |
| OBINUTUZUMAB                                             | GAZYVA   | 2014 | Yes | Chronic lymphocytic leukemia; Follicular lymphoma                                                                                                                                                                                                                                                                                                                                                                                                                                  | antagonist of smoothened receptors        |
| OFATUMUMAB                                               | ARZERRA  | 2012 | Yes | Chronic lymphocytic leukemia                                                                                                                                                                                                                                                                                                                                                                                                                                                       | Anti-CD20 monoclonal antibody             |
| OLAPARIB                                                 | LYNPARZA | 2016 | No  | Monotherapy for the maintenance treatment of adult patients with platinum-sensitive relapsed (PSR) BRCA-mutated (germline or somatic) high grade serous epithelial ovarian, fallopian tube or primary peritoneal cancer who are in response (complete response or partial response) to platinum-based chemotherapy.                                                                                                                                                                | SLAMF7 protein                            |
| OSIMERTINIB<br>MESYLATE                                  | TAGRISSO | 2016 | No  | EGFR Mutation-Positive NSCLC; EGFR T790M Mutation-Positive NSCLC                                                                                                                                                                                                                                                                                                                                                                                                                   | EGFR inhibitor                            |
| OXALIPLATIN                                              | ELOXATIN | 2007 | No  | Adjuvant treatment of patients with stage III colon cancer after complete resection of primary tumor; Treatment of patients with metastatic colorectal cancer                                                                                                                                                                                                                                                                                                                      | Targets DNA synthesis                     |
| PALBOCICLIB                                              | IBRANCE  | 2016 | No  | Treatment of patients with hormone receptor (HR)- positive, human epidermal growth factor receptor 2 (HER2)-negative locally advanced or metastatic breast cancer in combination with an aromatase inhibitor as initial endocrine-based therapy in post-menopausal women or men; or fulvestrant in patients with disease progression after prior endocrine therapy. Pre- or perimenopausal women must also be treated with a luteinizing hormone releasing hormone (LHRH) agonist. | BRAF inhibitor:                           |
| PANITUMUMAB                                              | VECTIBIX | 2008 | Yes | Treatment of previously untreated patients with non-mutated RAS metastatic colorectal carcinoma in combination with FolFox; As a monotherapy for the treatment of patients with non-mutated RAS mCRC after failure of fluoropyrimidine-oxaliplatin, and irinotecan-containing chemotherapy regimens.                                                                                                                                                                               | EGFR inhibitor                            |
| Pazopanib<br>Hydrochloride                               | VOTRIENT | 2010 | No  | Renal Cell Carcinoma; Soft tissue carcinoma                                                                                                                                                                                                                                                                                                                                                                                                                                        | EGFR inhibitor                            |
| PEMBROLIZUMAB                                            | KEYTRUDA | 2015 | Yes | Melanoma; Non-Small Cell Lung Carcinoma; Hodgkin Lymphoma; Primary Mediastinal B-Cell Lymphoma; Urothelial Carcinoma; Renal Cell Carcinoma; Microsatellite Instability-High Cancer; Endometrial carcinomas                                                                                                                                                                                                                                                                         | protein Cereblon<br>CBL                   |

|                           |          |      |     |                                                                                                                                                                                                                                                                                                                                                                                                                                                                                                             |                                                                                                |
|---------------------------|----------|------|-----|-------------------------------------------------------------------------------------------------------------------------------------------------------------------------------------------------------------------------------------------------------------------------------------------------------------------------------------------------------------------------------------------------------------------------------------------------------------------------------------------------------------|------------------------------------------------------------------------------------------------|
| PERTUZUMAB/TRASTUZUMAB    | PERJETA  | 2013 | Yes | Metastatic Breast Cancer; Early breast cancer                                                                                                                                                                                                                                                                                                                                                                                                                                                               | EGFR inhibitor                                                                                 |
| PONATINIB HYDROCHLORIDE   | ICLUSIG  | 2015 | Yes | Chronic phase, accelerated phase, or blast phase chronic myeloid leukemia or Philadelphia chromosome positive acute lymphoblastic leukemia for whom other tyrosine kinase inhibitor therapy is not appropriate                                                                                                                                                                                                                                                                                              | BCR-ABL inhibitor                                                                              |
| RADIUM (223Ra) DICHLORIDE | XOFIGO   | 2013 | No  | Castration resistant prostate cancer with symptomatic bone metastases and no known visceral metastatic disease.                                                                                                                                                                                                                                                                                                                                                                                             | VEGFR, EGFR, and RET tyrosine kinases inhibitor                                                |
| RAMUCIRUMAB               | CYRAMZA  | 2015 | Yes | Gastric cancer                                                                                                                                                                                                                                                                                                                                                                                                                                                                                              | HER2 receptor signaling inhibitor                                                              |
| REGORAFENIB               | STIVARGA | 2013 | No  | Metastatic colorectal cancer who have been previously treated with fluoropyrimidine-based chemotherapy, oxaliplatin, irinotecan, and anti-VEGF therapy, and if RAS wild type, an anti-EGFR therapy; Treatment of adult patients with metastatic and/or unresectable gastrointestinal stromal tumors who have disease progression or on intolerance to imatinib mesylate and sunitinib malate treatment; Treatment of patients with hepatocellular carcinoma who have been previously treated with sorafenib | DNA methyltransferase inhibitors                                                               |
| ROMIDEPSIN                | ISTODAX  | 2013 | No  | Relapsed/refractory peripheral T-cell lymphoma who are not eligible for transplant and have received at least one prior systemic therapy                                                                                                                                                                                                                                                                                                                                                                    | Epidermal Growth Factor Receptor                                                               |
| TEMSIROLIMUS              | TORISEL  | 2007 | No  | Metastatic renal cell carcinoma                                                                                                                                                                                                                                                                                                                                                                                                                                                                             | proteasome inhibitor                                                                           |
| TRABECTEDIN               | YONDELIS | 2010 | No  | In combination with Caelyx for treatment of platinum-sensitive ovarian cancer; for treatment of patients with metastatic liposarcoma or leiomyosarcoma                                                                                                                                                                                                                                                                                                                                                      | DNA                                                                                            |
| Trametinib                | MEKINIST | 2013 | No  | Unresectable or metastatic melanoma with a BRAF V600 mutation; Adjuvant treatment of melanoma; Metastatic Non-Small Cell Lung Cancer                                                                                                                                                                                                                                                                                                                                                                        | microtubule-targeting agent:                                                                   |
| TRASTUZUMAB EMTANSINE     | KADCYLA  | 2013 | Yes | Metastatic breast cancer; early breast cancer                                                                                                                                                                                                                                                                                                                                                                                                                                                               | histone deacetylases                                                                           |
| VANDETANIB                | CAPRELSA | 2012 | No  | For treatment of symptomatic or progressive medullary thyroid cancer in adult patients with unresectable locally advanced or metastatic disease                                                                                                                                                                                                                                                                                                                                                             | mitogen-activated extracellular signal regulated kinase 1 (MEK1) inhibitor and MEK2 activation |

|             |           |      |    |                                                                                                                                                                                                                                                   |                                           |
|-------------|-----------|------|----|---------------------------------------------------------------------------------------------------------------------------------------------------------------------------------------------------------------------------------------------------|-------------------------------------------|
| VEMURAFENIB | ZELBORAF  | 2012 | No | Monotherapy for BRAF V600 mutation-positive unresectable or metastatic melanoma.                                                                                                                                                                  | Bcr-Abl tyrosine kinase protein inhibitor |
| VENETOCLAX  | VENCLEXTA | 2016 | No | Chronic lymphocytic leukemia for those who have received at least one prior therapy; Monotherapy for patients with CLL with 17p deletion who have received at least one prior therapy and for whom there are no other available treatment options | Epidermal Growth Factor Receptor          |
| VISMODEGIB  | ERIVEDGE  | 2013 | No | Treatment of adults with histologically confirmed metastatic basal cell carcinoma or locally advanced basal cell carcinoma inappropriate for surgery or radiotherapy                                                                              | ALK/MET tyrosine kinase inhibitor         |
| VORINOSTAT  | ZOLINZA   | 2009 | No | Cutaneous manifestations in patients with advanced cutaneous T-cell lymphoma who have progressive, persistent or recurrent disease subsequent to prior systemic therapies                                                                         | EGFR R inhibitor                          |
